# Supplementary material for: [Cs©C18]+and [Na©C14]+: perfect planar alkaline-metal-centered polyynic cyclo[n]carbon complexes with record coordination numbers
Source: Royal Society of Chemistry journal article supplement (doi:10.1039/d3ra03930g), 2023-01-01
Supplement: d3ra03930g1.pdf [file d3ra03930g1.pdf]

## Supporting Information

**[Cs@C<sub>18</sub>]<sup>+</sup> and [Na@C<sub>14</sub>]<sup>+</sup>: perfect planar alkaline-metal-centered polyynic cyclo[n]carbon complexes with record coordination numbers**

Min Zhang<sup>1</sup>, Rui-Nan Yuan, Yan-Bo Wu, Qiang Chen (✉), Zhihong Wei (✉), and Si-Dian Li (✉)\*

Institute of Molecular Science, Shanxi University, Taiyuan 030006, China

## Contents

- Figure S1** Optimized global minimum structures of  $D_{9h}$   $C_{18}$  and  $D_{7h}$   $C_{14}$  at M06-2X level
- Figure S2** Optimized global minimum structures of (a)  $M@C_{18}^+$  ( $M = \text{Li, Na, K, Rb, Cs, and Fr}$ ) and (b)  $M@C_{14}^+$  ( $M = \text{Li, Na and K}$ ) at M06-2X level.
- Figure S3** Relative energies of the low-lying isomers of  $Cs@C_{18}^+$ .
- Figure S4** Relative energies of the low-lying isomers of  $Cs@C_{17}B$ .
- Figure S5** Relative energies of the low-lying isomers of  $Cs@C_{17}^-$ .
- Figure S6** Relative energies of the low-lying isomers of  $Na@C_{14}^+$ .
- Figure S7** Relative energies of the low-lying isomers of  $Na@C_{13}B$ .
- Figure S8** Relative energies of the low-lying isomers of  $Na@C_{13}^-$ .
- Figure S9** Simulated IR and Raman spectra of (a)  $D_{9h}$   $Cs@C_{18}^+$  (**1**) and (b)  $D_{7h}$   $Na@C_{14}^+$  (**4**) at M06-2X/aug-cc-pvtz level.
- Figure S10** Shape of the deformation densities  $\Delta\rho_{(1)-(3)}$  are associated with the orbital interactions  $\Delta E_{(1)-(3)}$  in  $Cs@C_{18}^+$  (**1**).
- Figure S11** Shape of the deformation densities  $\Delta\rho_{(1)-(3)}$  are associated with the orbital interactions  $\Delta E_{(1)-(3)}$  in  $Na@C_{14}^+$  (**4**).
- Figure S12** Delocalized in-plane  $\sigma$  MOs, in-plane  $\pi$  MOs, and out-of-plane  $\pi$  MOs of (a)  $D_{9h}$   $Cs@C_{18}^+$  (**1**), (b)  $C_{2v}$   $Cs@C_{17}^-$  (**3**), and (c)  $D_{7h}$   $Na@C_{14}^+$  (**4**).
- Figure S13** AdNDP bonding analysis of  $C_s$   $Cs@C_{17}B$  (**2**).
- Table S1** Comparison of the calculated HOMO-LUMO gaps ( $\Delta E_{\text{gap}}$ ) and optimized bond lengths ( $r_{C-C}$  and  $r_{C=C}$ ) of  $D_{9h}$   $[Cs@C_{18}]^+$  (**1**) and  $D_{7h}$   $[Na@C_{14}]^+$  (**4**) and their polyynic cyclo[n]carbon ligands  $D_{9h}$   $C_{18}$  and  $D_{7h}$   $C_{14}$ .
- Table S2** Comparison of EDA analyses of  $D_{9h}$   $Cs@C_{18}^+$  (**1**) in two different schemes ( $Cs^+ + C_{18}$  and  $Cs + C_{18}^+$ ).
- Table S3** Compositions from the  $C_{18}$  and  $Cs^+$  to the  $20e_1'$ ,  $19e_1'$ ,  $15a_1'$  and  $12e_1'$  MOs of  $D_{3h}$   $Cs@C_{18}^+$ .
- Table S4** Compositions from the  $C_{14}$  and  $Na^+$  to the  $5e_2'$ ,  $6e_1'$ ,  $6a_1'$  and  $4e_1'$  MOs of  $D_{7h}$   $Na@C_{14}^+$ .
- Table S5** Optimized coordinates (x, y, z) of  $D_{9h}$   $Cs@C_{18}^+$  (**1**),  $C_s$   $Cs@C_{17}B$  (**2**),  $C_{2v}$   $Cs@C_{17}^-$  (**3**),  $D_{7h}$   $Na@C_{14}^+$  (**4**),  $C_s$   $Na@C_{13}B$  (**5**), and  $C_{2v}$   $Na@C_{13}^-$  (**6**) at M06-2X/aug-cc-pvtz level.

**Fig.S1** Optimized global minimum structures of  $D_{9h}$  C<sub>18</sub> and  $D_{7h}$  C<sub>14</sub> at M06-2X level.

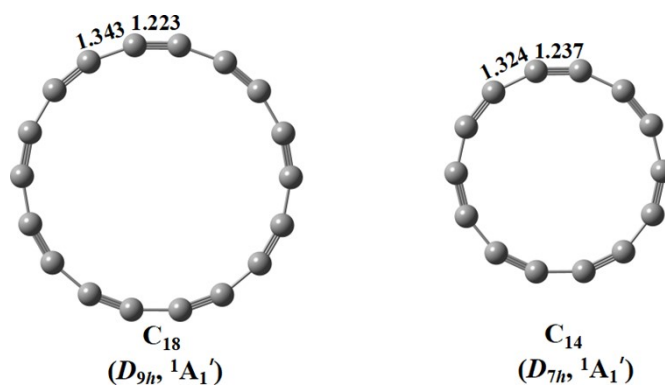

**Fig. S2** Optimized global minimum structures of (a)  $M@C_{18}^+$  ( $M = \text{Li, Na, K, Rb, Cs,}$  and  $\text{Fr}$ ) and (b)  $M@C_{14}^+$  ( $M = \text{Li, Na}$  and  $\text{K}$ ) at M06-2X level.

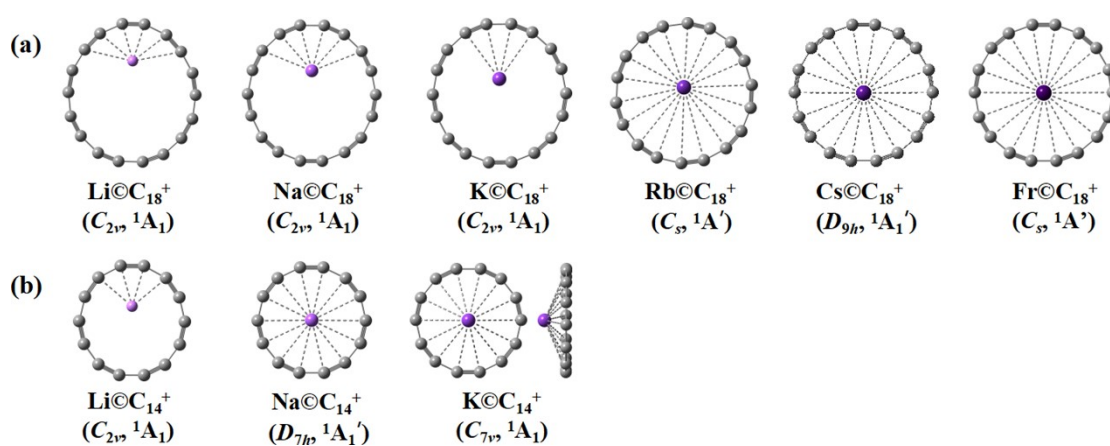

**Fig. S3** Relative energies (in eV) of the low-lying isomers of Cs@C<sub>18</sub><sup>+</sup> at M06-2X and ωB97XD levels (parentheses).

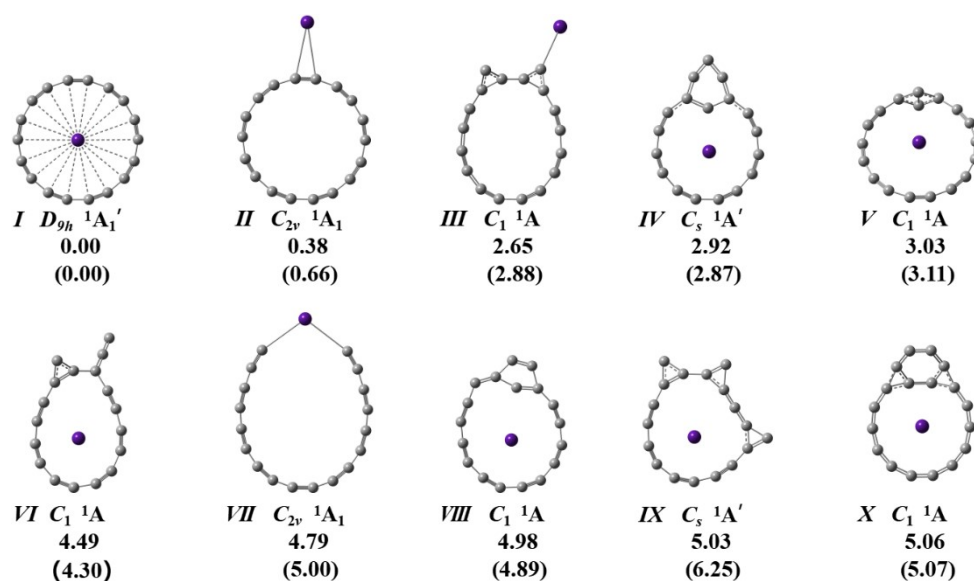

**Fig. S4** Relative energies (in eV) of the low-lying isomers of Cs@C<sub>17</sub>B at M06-2X and ωB97XD levels (parentheses).

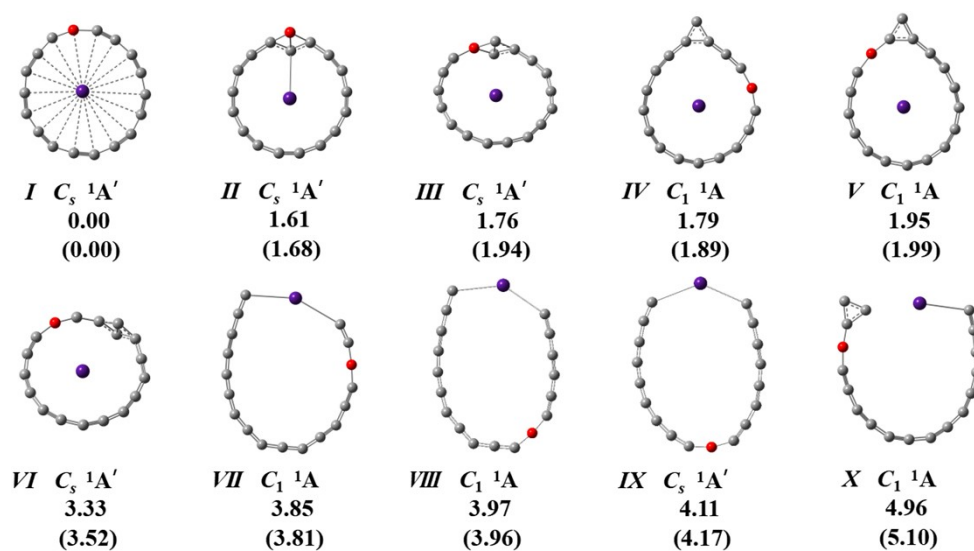

**Fig. S5** Relative energies (in eV) of the low-lying isomers of Cs@C<sub>17</sub><sup>-</sup> at M06-2X and ωB97XD levels (parentheses).

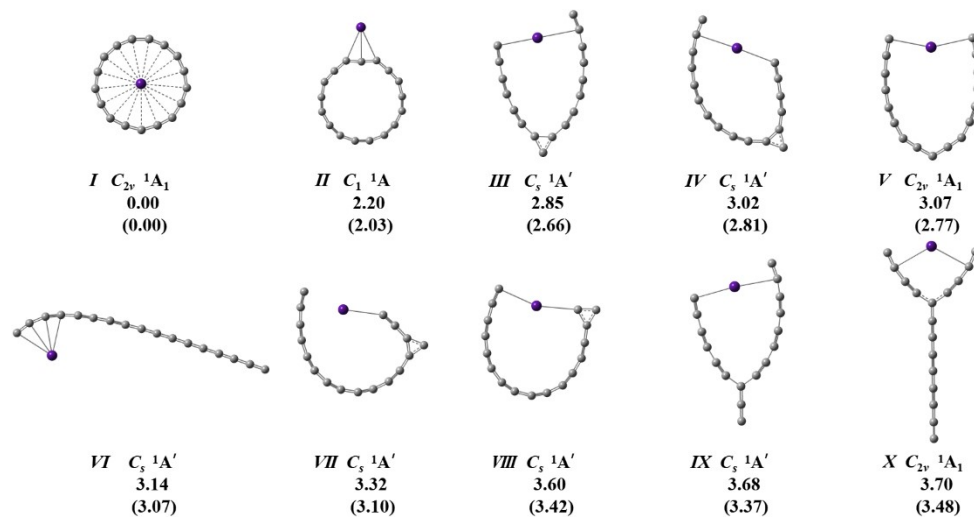

**Fig. S6** Relative energies (in eV) of the low-lying isomers of Na@C<sub>14</sub><sup>+</sup> at M06-2X and ωB97XD levels (parentheses).

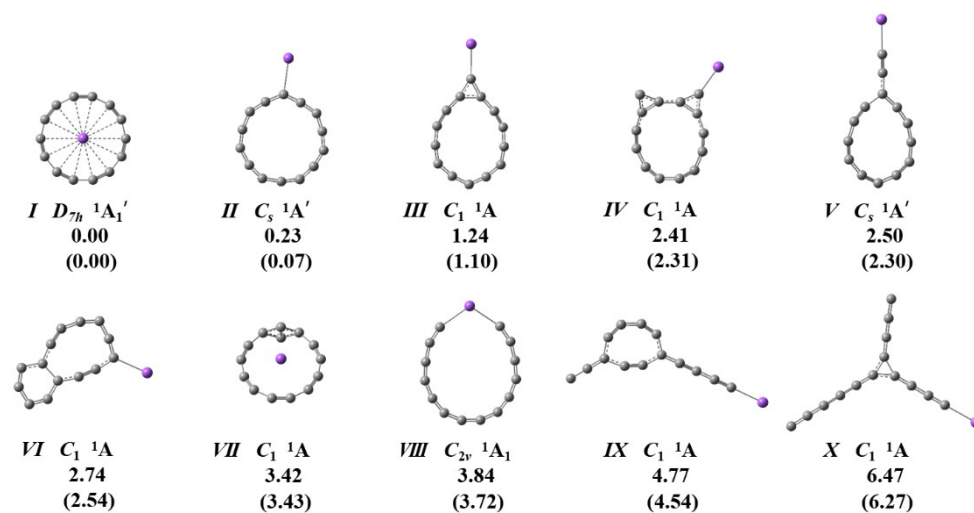

**Fig. S7** Relative energies (in eV) of the low-lying isomers of Na@C<sub>13</sub>B at M06-2X and  $\omega$ B97XD levels (parentheses).

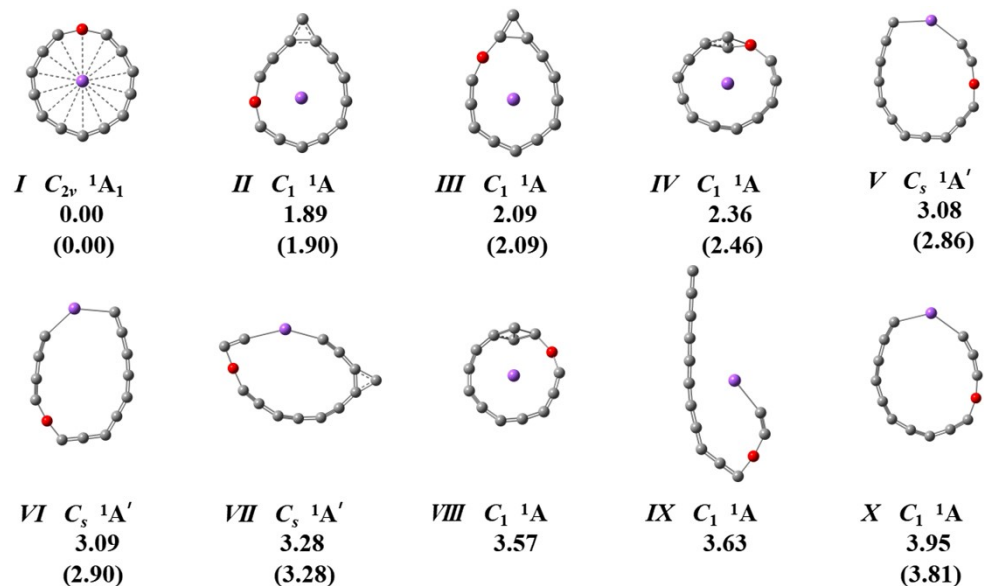

**Fig. S8** Relative energies (in eV) of the low-lying isomers of Na@C<sub>13</sub><sup>-</sup> at M06-2X level.

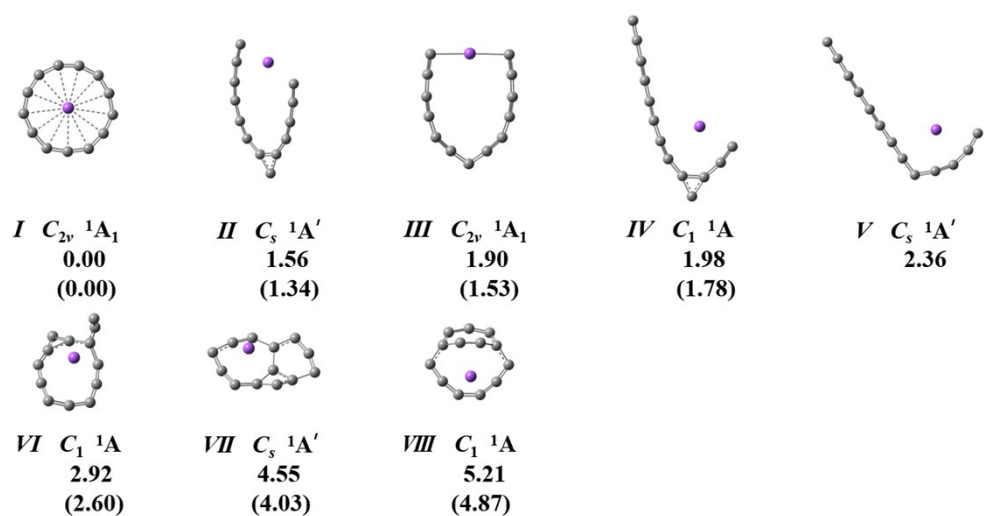

**Fig. S9** Simulated IR, Raman, and UV-vis spectra (with 100 excited states included) of (a)  $D_{9h}$  Cs@C<sub>18</sub><sup>+</sup> (**1**) and (b)  $D_{7h}$  Na@C<sub>14</sub><sup>+</sup> (**4**) at M06-2X/aug-cc-pvtz level.

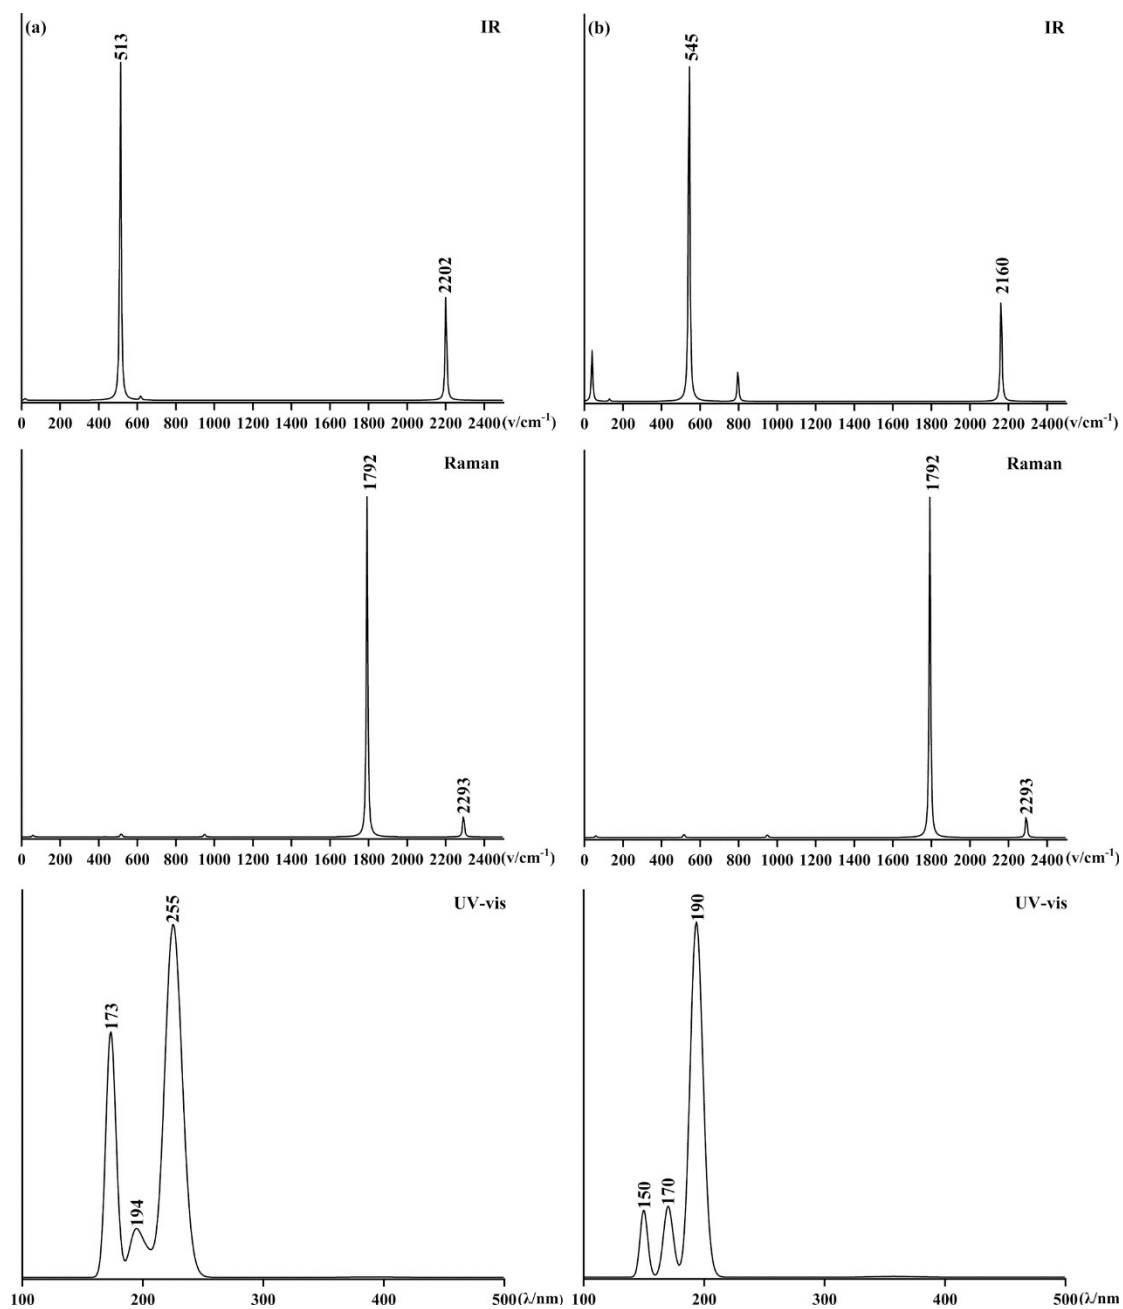

**Fig. S10** Deformation densities  $\Delta\rho_{(1)-(3)}$   $\text{Cs}\text{C}\text{C}_{18}^+$  (**1**) associated with the orbital interactions  $\Delta E_{(1)-(3)}$  tabulated in Table S2. Only one component of the orbital terms is shown. The color code of the charge flow is from red to blue.

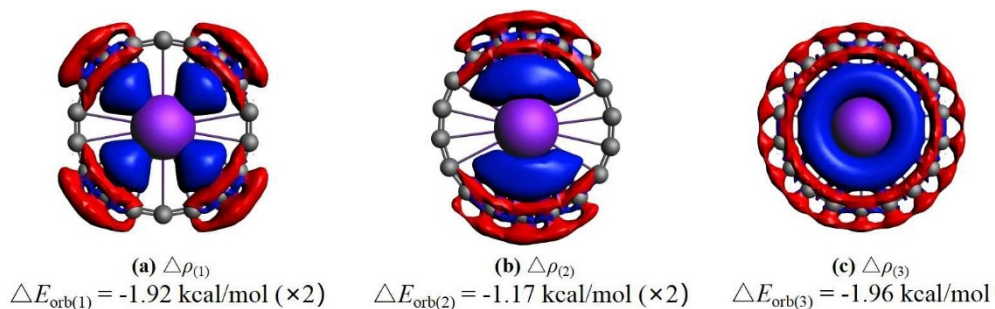

**Fig. S11** Deformation densities  $\Delta\rho_{(1)-(3)}$  of  $\text{Na}\text{C}\text{C}_{14}^+$  (**4**) associated with the orbital interactions  $\Delta E_{(1)-(3)}$  tabulated in Table S3. Only one component of the orbital terms is shown. The color code of the charge flow is red to blue.

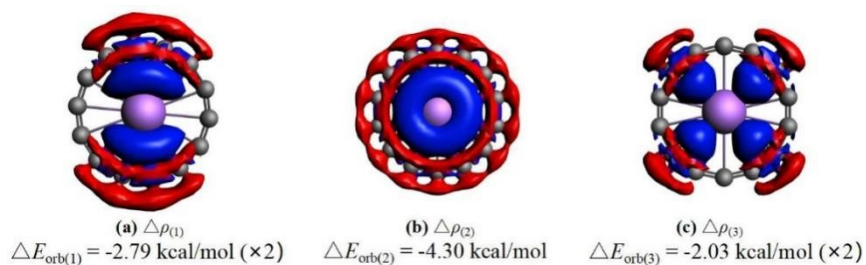

**Fig. S12** AdNDP bonding pattern of  $C_s$   $\text{Cs}\text{C}\text{C}_{17}\text{B}$  (**2**), with the occupation numbers indicated.



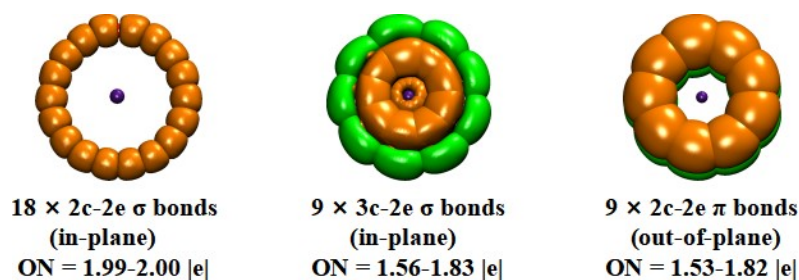

**Fig. S13** The nine delocalized out-of-plane  $\pi$  MOs and nine delocalized in-plane  $\sigma$  MOs of  $D_{9h}$  Cs@C<sub>18</sub><sup>+</sup> (**1**) and seven delocalized out-of-plane  $\pi$  MOs and seven delocalized in-plane  $\sigma$  MOs of  $D_{7h}$  Na@C<sub>14</sub><sup>+</sup> (**4**).

**(a)** Cs@C<sub>18</sub><sup>+</sup> (**1**)

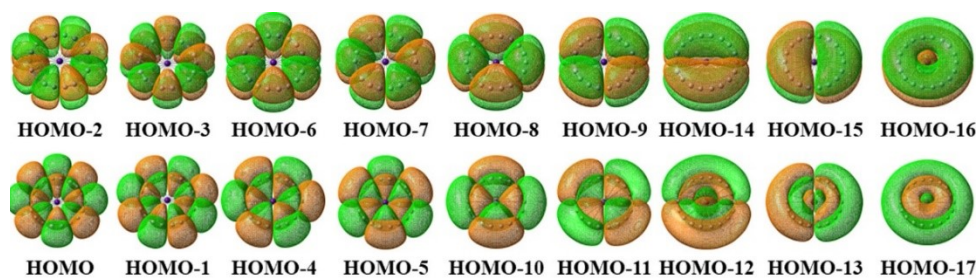

**(b)** Na@C<sub>14</sub><sup>+</sup> (**4**)

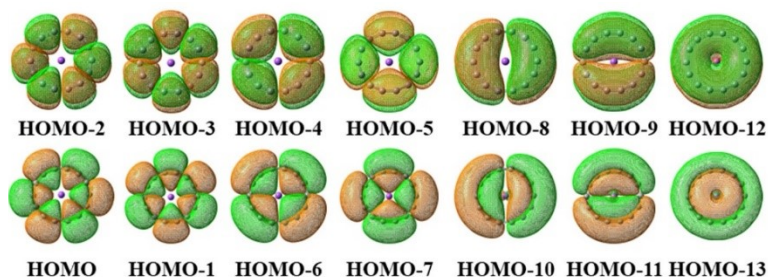

**Table S1** Comparison of the calculated HOMO-LUMO gaps ( $\Delta E_{\text{gap}}$ ) and optimized bond lengths ( $r_{\text{C-C}}$  and  $r_{\text{C=C}}$ ) of  $D_{9h}$  [Cs@C<sub>18</sub>]<sup>+</sup> (**1**) and  $D_{7h}$  [Na@C<sub>14</sub>]<sup>+</sup> (**4**) and their polyynic cyclo[n]carbon ligands  $D_{9h}$  C<sub>18</sub> and  $D_{7h}$  C<sub>14</sub>.

|                                             | $\Delta E_{\text{gap}}/\text{eV}$ | $r_{\text{C-C}}/\text{\AA}$ | $r_{\text{C=C}}/\text{\AA}$ |
|---------------------------------------------|-----------------------------------|-----------------------------|-----------------------------|
| $D_{9h}$ [Cs@C <sub>18</sub> ] <sup>+</sup> | 5.38                              | 1.343                       | 1.224                       |
| $D_{9h}$ C <sub>18</sub>                    | 5.31                              | 1.345                       | 1.226                       |
| $D_{7h}$ [Na@C <sub>14</sub> ] <sup>+</sup> | 5.87                              | 1.326                       | 1.240                       |

|                 |      |       |       |
|-----------------|------|-------|-------|
| $D_{7h} C_{14}$ | 5.77 | 1.324 | 1.237 |
|-----------------|------|-------|-------|

**Table S2** Comparison of EDA analyses of  $D_{9h}$  Cs@C<sub>18</sub><sup>+</sup> (**1**) in two different schemes (Cs<sup>+</sup> + C<sub>18</sub> and Cs + C<sub>18</sub><sup>+</sup>) at M06-2X/TZ2P-ZORA level. All energy values are in kcal mol<sup>-1</sup>.

| Energy terms               | Interacting fragments             |                                   |
|----------------------------|-----------------------------------|-----------------------------------|
|                            | Cs <sup>+</sup> + C <sub>18</sub> | Cs + C <sub>18</sub> <sup>+</sup> |
| $\Delta E_{\text{int}}$    | -15.22                            | -1102.48                          |
| $\Delta E_{\text{Pauli}}$  | 1.89                              | 263.26                            |
| $\Delta E_{\text{elstat}}$ | -3.16                             | -261.13                           |
| $\Delta E_{\text{orb}}$    | -13.95                            | -1104.61                          |

**Table S3** Compositions from the C<sub>18</sub> and Cs<sup>+</sup> to the 20e<sub>1</sub>' , 19e<sub>1</sub>' and 15a<sub>1</sub>' MOs of  $D_{3h}$  Cs@C<sub>18</sub><sup>+</sup>.

| MOs                | Compositions                                                                                                         |
|--------------------|----------------------------------------------------------------------------------------------------------------------|
| 20e <sub>1</sub> ' | 98.05% (C <sub>18</sub> 14e <sub>1</sub> ') + 1.89% (Cs <sup>+</sup> 14e <sub>1</sub> ')                             |
| 19e <sub>1</sub> ' | 96.61% (C <sub>18</sub> 13e <sub>1</sub> ') + 2.81% (Cs <sup>+</sup> 6e <sub>1</sub> ') + 0.59% (10e <sub>1</sub> ') |
| 15a <sub>1</sub> ' | 98.10% (C <sub>18</sub> 8a <sub>1</sub> ') + 0.85% (Cs <sup>+</sup> 8a <sub>1</sub> ')                               |

**Table S4** Compositions from the C<sub>14</sub> and Na<sup>+</sup> to the 5e<sub>2</sub>' , 6e<sub>1</sub>' and 6a<sub>1</sub>' MOs of  $D_{7h}$  Na@C<sub>14</sub><sup>+</sup>.

| MOs | Compositions |
|-----|--------------|
|-----|--------------|

|                   |                                                                                        |
|-------------------|----------------------------------------------------------------------------------------|
| 5e <sub>2</sub> ' | 98.28% (C <sub>14</sub> 5e <sub>2</sub> ') + 1.24% (Na <sup>+</sup> 1e <sub>2</sub> ') |
| 6e <sub>1</sub> ' | 96.26% (C <sub>14</sub> 3e <sub>1</sub> ') + 3.42% (Na <sup>+</sup> 2e <sub>1</sub> ') |
| 6a <sub>1</sub> ' | 96.27% (C <sub>14</sub> 4a <sub>1</sub> ') + 2.53% (Na <sup>+</sup> 3a <sub>1</sub> ') |

**Table S5** Optimized coordinates (x, y, z) of *D*<sub>9h</sub> Cs@C<sub>18</sub><sup>+</sup> (**1**), *C*<sub>s</sub> Cs@C<sub>17</sub>B (**2**), *C*<sub>2v</sub> Cs@C<sub>17</sub><sup>-</sup> (**3**), *D*<sub>7h</sub> Na@C<sub>14</sub><sup>+</sup> (**4**), *C*<sub>2v</sub> Na@C<sub>13</sub>B (**5**), and *C*<sub>2v</sub> Na@C<sub>13</sub><sup>-</sup> (**6**) at M06-2X level.

Cs@C<sub>18</sub><sup>+</sup> (**1**)

|    |             |             |            |
|----|-------------|-------------|------------|
| C  | -0.61185300 | 3.64473100  | 0.00000000 |
| C  | -1.87408200 | 3.18531800  | 0.00000000 |
| C  | -2.81149500 | 2.39873500  | 0.00000000 |
| C  | -3.48311200 | 1.23545800  | 0.00000000 |
| C  | -3.69560700 | 0.03034400  | 0.00000000 |
| C  | -3.46235600 | -1.29248600 | 0.00000000 |
| C  | -0.67161800 | -3.63419300 | 0.00000000 |
| C  | 0.67161800  | -3.63419300 | 0.00000000 |
| C  | 0.61185300  | 3.64473100  | 0.00000000 |
| C  | 1.87408200  | 3.18531800  | 0.00000000 |
| C  | 2.81149500  | 2.39873500  | 0.00000000 |
| C  | 3.48311200  | 1.23545800  | 0.00000000 |
| C  | 3.69560700  | 0.03034400  | 0.00000000 |
| C  | 3.46235600  | -1.29248600 | 0.00000000 |
| C  | 2.85050300  | -2.35224600 | 0.00000000 |
| C  | 1.82152500  | -3.21566100 | 0.00000000 |
| C  | -2.85050300 | -2.35224600 | 0.00000000 |
| C  | -1.82152500 | -3.21566100 | 0.00000000 |
| Cs | 0.00000000  | 0.00000000  | 0.00000000 |

Cs@C<sub>17</sub>B (**2**)

|   |             |             |            |
|---|-------------|-------------|------------|
| C | -3.50078000 | -1.29928000 | 0.00000000 |
| C | -3.59256600 | -0.05583100 | 0.00000000 |
| C | -3.42944600 | 1.24615000  | 0.00000000 |
| C | -2.71672900 | 2.27906400  | 0.00000000 |
| C | -1.80615200 | 3.20987100  | 0.00000000 |
| C | -0.59225300 | 3.57395600  | 0.00000000 |

|    |             |             |            |
|----|-------------|-------------|------------|
| C  | 3.03714500  | 2.30727600  | 0.00000000 |
| C  | 3.50860200  | 1.16777200  | 0.00000000 |
| C  | -2.80903800 | -2.42264800 | 0.00000000 |
| C  | -1.93335900 | -3.30178500 | 0.00000000 |
| C  | -0.67555300 | -3.71666500 | 0.00000000 |
| C  | 0.55889300  | -3.79050500 | 0.00000000 |
| C  | 1.78574200  | -3.28105700 | 0.00000000 |
| C  | 2.75700700  | -2.52017200 | 0.00000000 |
| C  | 3.39799700  | -1.35356200 | 0.00000000 |
| C  | 3.68337000  | -0.15532500 | 0.00000000 |
| C  | 0.68968900  | 3.73847300  | 0.00000000 |
| Cs | 0.00000000  | 0.18013900  | 0.00000000 |
| B  | 1.96491800  | 3.26759100  | 0.00000000 |

Cs@C<sub>17</sub><sup>-</sup> (3)

|    |            |             |             |
|----|------------|-------------|-------------|
| C  | 0.00000000 | 2.81836000  | 2.10611200  |
| C  | 0.00000000 | 3.32079700  | 0.95158400  |
| C  | 0.00000000 | 3.51825400  | -0.34047400 |
| C  | 0.00000000 | 3.08066800  | -1.52952600 |
| C  | 0.00000000 | 2.38021500  | -2.62250800 |
| C  | 0.00000000 | 1.24043700  | -3.19830700 |
| C  | 0.00000000 | 0.00000000  | -3.54429200 |
| C  | 0.00000000 | -1.24043700 | -3.19830700 |
| C  | 0.00000000 | -2.38021500 | -2.62250800 |
| C  | 0.00000000 | -3.08066800 | -1.52952600 |
| C  | 0.00000000 | -3.51825400 | -0.34047400 |
| C  | 0.00000000 | -3.32079700 | 0.95158400  |
| C  | 0.00000000 | -2.81836000 | 2.10611200  |
| C  | 0.00000000 | -1.81873400 | 2.95755500  |
| C  | 0.00000000 | -0.65764900 | 3.43295500  |
| C  | 0.00000000 | 0.65764900  | 3.43295500  |
| C  | 0.00000000 | 1.81873400  | 2.95755500  |
| Cs | 0.00000000 | 0.00000000  | 0.00321900  |

Na@C<sub>14</sub><sup>+</sup> (4)

|   |            |             |            |
|---|------------|-------------|------------|
| C | 0.61977300 | 2.81465100  | 0.00000000 |
| C | 1.81416100 | 2.23946400  | 0.00000000 |
| C | 2.58700500 | 1.27034900  | 0.00000000 |
| C | 2.88199500 | -0.02208500 | 0.00000000 |
| C | 2.60617000 | -1.23055200 | 0.00000000 |

|    |             |             |            |
|----|-------------|-------------|------------|
| C  | 1.77962700  | -2.26700400 | 0.00000000 |
| C  | -0.61977300 | 2.81465100  | 0.00000000 |
| C  | -1.81416100 | 2.23946400  | 0.00000000 |
| C  | -2.58700500 | 1.27034900  | 0.00000000 |
| C  | -2.88199500 | -0.02208500 | 0.00000000 |
| C  | -2.60617000 | -1.23055200 | 0.00000000 |
| C  | -1.77962700 | -2.26700400 | 0.00000000 |
| C  | -0.66283600 | -2.80482300 | 0.00000000 |
| C  | 0.66283600  | -2.80482300 | 0.00000000 |
| Na | 0.00000000  | 0.00000000  | 0.00000000 |

Na@C<sub>13</sub>B (5)

|    |            |             |             |
|----|------------|-------------|-------------|
| C  | 0.00000000 | 1.36516500  | 2.71479300  |
| C  | 0.00000000 | 2.21557500  | 1.78203200  |
| C  | 0.00000000 | 2.84087900  | 0.63856100  |
| C  | 0.00000000 | 2.71276000  | -0.62285600 |
| C  | 0.00000000 | 2.27396700  | -1.83892300 |
| C  | 0.00000000 | 1.21350200  | -2.54939600 |
| C  | 0.00000000 | -1.36516500 | 2.71479300  |
| C  | 0.00000000 | -2.21557500 | 1.78203200  |
| C  | 0.00000000 | -2.84087900 | 0.63856100  |
| C  | 0.00000000 | -2.71276000 | -0.62285600 |
| C  | 0.00000000 | -2.27396700 | -1.83892300 |
| C  | 0.00000000 | -1.21350200 | -2.54939600 |
| C  | 0.00000000 | 0.00000000  | -2.97103200 |
| Na | 0.00000000 | 0.00000000  | 0.11157800  |
| B  | 0.00000000 | 0.00000000  | 3.02166000  |

Na@C<sub>13</sub><sup>-</sup> (6)

|   |            |             |             |
|---|------------|-------------|-------------|
| C | 0.00000000 | 0.00000000  | 2.62603200  |
| C | 0.00000000 | 1.27381400  | 2.43815900  |
| C | 0.00000000 | 2.16824000  | 1.49434100  |
| C | 0.00000000 | 2.71777900  | 0.34364600  |
| C | 0.00000000 | 2.47868300  | -0.94549100 |
| C | 0.00000000 | 1.81136300  | -2.02100300 |
| C | 0.00000000 | 0.63103000  | -2.60631900 |
| C | 0.00000000 | -0.63103000 | -2.60631900 |
| C | 0.00000000 | -1.81136300 | -2.02100300 |
| C | 0.00000000 | -2.47868300 | -0.94549100 |

|    |            |             |             |
|----|------------|-------------|-------------|
| C  | 0.00000000 | -2.71777900 | 0.34364600  |
| C  | 0.00000000 | -2.16824000 | 1.49434100  |
| C  | 0.00000000 | -1.27381400 | 2.43815900  |
| Na | 0.00000000 | 0.00000000  | -0.01783500 |
